# Supplementary material for: Diagnostic and therapeutic recommendations for the treatment of hyperphenylalaninemia in patients 0–4 years of age
Source: Springer Nature journal article supplement (doi:10.1186/s13023-018-0911-6), 2018-09-29
Supplement: MOESM1 [file 16162374]

**Dose-dependent dissolution recommendations for sapropterin according to the guidance for water dilution**

| 10 mg/kg per day |                     |                                            | Dose table for children weighing up to 20 kg |                                                         |
|------------------|---------------------|--------------------------------------------|----------------------------------------------|---------------------------------------------------------|
| Weight (kg)      | Total dose (mg/day) | Number of tablets to be dissolved in water | Volume of water to be added (mL)             | Volume of solution to be administered to the child (mL) |
| 2                | 20                  | 1                                          | 20                                           | 4                                                       |
| 3                | 30                  | 1                                          | 20                                           | 6                                                       |
| 4                | 40                  | 1                                          | 20                                           | 8                                                       |
| 5                | 50                  | 1                                          | 20                                           | 10                                                      |
| 6                | 60                  | 1                                          | 20                                           | 12                                                      |
| 7                | 70                  | 1                                          | 20                                           | 14                                                      |
| 8                | 80                  | 1                                          | 20                                           | 16                                                      |
| 9                | 90                  | 1                                          | 20                                           | 18                                                      |
| 10               | 100                 | 1                                          | 20                                           | 20                                                      |
| 11               | 110                 | 2                                          | 40                                           | 22                                                      |
| 12               | 120                 | 2                                          | 40                                           | 24                                                      |
| 13               | 130                 | 2                                          | 40                                           | 26                                                      |
| 14               | 140                 | 2                                          | 40                                           | 28                                                      |
| 15               | 150                 | 2                                          | 40                                           | 30                                                      |
| 16               | 160                 | 2                                          | 40                                           | 32                                                      |
| 17               | 170                 | 2                                          | 40                                           | 34                                                      |
| 18               | 180                 | 2                                          | 40                                           | 36                                                      |
| 19               | 190                 | 2                                          | 40                                           | 38                                                      |
| 20               | 200                 | 2                                          | 40                                           | 40                                                      |
| 20 mg/kg per day |                     |                                            | Dose table for children weighing up to 20 kg |                                                         |
| 2                | 40                  | 1                                          | 20                                           | 8                                                       |
| 3                | 60                  | 1                                          | 20                                           | 12                                                      |
| 4                | 80                  | 1                                          | 20                                           | 16                                                      |
| 5                | 100                 | 1                                          | 20                                           | 20                                                      |
| 6                | 120                 | 2                                          | 40                                           | 24                                                      |
| 7                | 140                 | 2                                          | 40                                           | 28                                                      |
| 8                | 160                 | 2                                          | 40                                           | 32                                                      |
| 9                | 180                 | 2                                          | 40                                           | 36                                                      |
| 10               | 200                 | 2                                          | 40                                           | 40                                                      |
| 11               | 220                 | 3                                          | 60                                           | 44                                                      |
| 12               | 240                 | 3                                          | 60                                           | 48                                                      |
| 13               | 260                 | 3                                          | 60                                           | 52                                                      |
| 14               | 280                 | 3                                          | 60                                           | 56                                                      |
| 15               | 300                 | 3                                          | 60                                           | 60                                                      |
| 16               | 320                 | 4                                          | 80                                           | 64                                                      |
| 17               | 340                 | 4                                          | 80                                           | 68                                                      |
| 18               | 360                 | 4                                          | 80                                           | 72                                                      |
| 19               | 380                 | 4                                          | 80                                           | 76                                                      |
| 20               | 400                 | 4                                          | 80                                           | 80                                                      |
